# Supplementary material for: Erratum to “miR319, miR390, and miR393 Are Involved in Aluminum Response in Flax (Linum usitatissimum L.)”
Source: Hindawi journal article supplement (doi:10.1155/2017/6915898), 2017-08-13
Supplement: f1 [file 6915898.f1.zip]

Archive with 3 entries (3 files):
- Supplementary Table 1.docx
- Supplementary Table 2.docx
- Supplementary Table 3.xlsx
