# Supplementary material for: Erratum to “miR319, miR390, and miR393 Are Involved in Aluminum Response in Flax (Linum usitatissimum L.)”
Source: Hindawi journal article supplement (doi:10.1155/2017/6915898), 2017-08-13
Supplement: f1 [file 6915898.f1.zip › Supplementary Table 3.xlsx]

## Sheet: Suppl table 3 psRNATarget
Supplementary Table 3. Target prediction for flax miRNAs using psRNA Target server.
JGI Genome portal
miRNA_Acc.	Target_Acc.	Expectation	UPE	Target_start	Target_end	miRNA_aligned_fragment	Target_aligned_fragment	Inhibition	Target_Desc.	Multiplicity
miR319
UUGGACUGAAGGGAGCUCCCU	Lus10006981	2.5	20.85	203	222	UUGGACUGAAGGGAGCUCCC	GGGAGCUCCCUUUAGUUUGG	Cleavage	CAP (Cysteine-rich secretory proteins, Antigen 5, and Pathogenesis-related 1 protein) superfamily protein	1
UUGGACUGAAGGGAGCUCCCU	Lus10036103	2.5	20.727	932	951	UUGGACUGAAGGGAGCUCCC	UGGAGCUCCCUUCACUCCAA	Cleavage	MYB65 myb domain protein 65	1
UUGGACUGAAGGGAGCUCCCU	Lus10008685	2.5	19.998	968	987	UUGGACUGAAGGGAGCUCCC	CGGAGCUCCCUUCACUCCAA	Cleavage	MYB65 myb domain protein 65	1
UUGGACUGAAGGGAGCUCCCU	Lus10026142	2.5	21.917	2501	2520	UUGGACUGAAGGGAGCUCCC	UGGAGCUCCCUUCACUCCAA	Cleavage	MYB65 myb domain protein 65	1
UUGGACUGAAGGGAGCUCCCU	Lus10002195	3.0	11.866	61	80	UUGGACUGAAGGGAGCUCCC	AGGGGUCCCCUUCAGUCCAA	Cleavage	TCP3 TEOSINTE BRANCHED 1, cycloidea and PCF transcription factor 3	1
UUGGACUGAAGGGAGCUCCCU	Lus10000463	3.0	15.906	859	878	UUGGACUGAAGGGAGCUCCC	AGGGGUCCCCUUCAGUCCAA	Cleavage	TCP4 TCP family transcription factor 4	1
miR393
UCCAAAGGGAUCGCAUUGAUUU	Lus10031991	1.5	20.818	1108	1129	UCCAAAGGGAUCGCAUUGAUUU	GAGACAAUGCGAUCCCUUUGGA	Cleavage	AFB2 auxin signaling F-box 2	1
UCCAAAGGGAUCGCAUUGAUUU	Lus10035160	1.5	20.46	1498	1519	UCCAAAGGGAUCGCAUUGAUUU	GAGACAAUGCGAUCCCUUUGGA	Cleavage	AFB2 auxin signaling F-box 2	1
UCCAAAGGGAUCGCAUUGAUUU	Lus10015722	3.0	23.859	31	50	UCCAAAGGGAUCGCAUUGAU	GUCACUGCUGUCCCUUUGGA	Cleavage	zinc finger (C3HC4-type RING finger) family protein	1
UCCAAAGGGAUCGCAUUGAUUU	Lus10040823	3.0	23.755	2185	2204	UCCAAAGGGAUCGCAUUGAU	AUCAUCGUGAUCUCUUUGGA	Cleavage	PLL5 pol-like 5	1
miR390
AAGCUCAGGAGGGAUAGCGCC	Lus10017782	3.0	23.657	823	843	AAGCUCAGGAGGGAUAGCGCC	GGCUCUAUCCCUUCUGAGUUG	Cleavage	Leucine-rich receptor-like protein kinase family protein	1
AAGCUCAGGAGGGAUAGCGCC	Lus10029151	3.0	19.672	781	801	AAGCUCAGGAGGGAUAGCGCC	GGGGUUGUCCUUCUUGAGCUU	Cleavage	Protein kinase superfamily protein	1
AAGCUCAGGAGGGAUAGCGCC	Lus10013014	3.0	19.29	781	801	AAGCUCAGGAGGGAUAGCGCC	GGGGUUGUCCUUCUUGAGCUU	Cleavage	Protein kinase superfamily protein	1
AAGCUCAGGAGGGAUAGCGCC	Lus10009533	3.0	13.96	130	150	AAGCUCAGGAGGGAUAGCGCC	GGCCCUGUCCCUCCUGAUCUU	Cleavage	GRF5 growth-regulating factor 5	1
AAGCUCAGGAGGGAUAGCGCC	Lus10013013	3.0	19.29	1828	1848	AAGCUCAGGAGGGAUAGCGCC	GGGGUUGUCCUUCUUGAGCUU	Cleavage	RHS10 root hair specific 10	1
AAGCUCAGGAGGGAUAGCGCC	Lus10026690	2.5	12.695	50	69	AAGCUCAGGAGGGAUAGCGC	ACGCUCUCUCUCCUGAGCUU	Cleavage	PHS1 poor homologous synapsis 1	3
AAGCUCAGGAGGGAUAGCGCC	Lus10026690	2.5	12.689	164	183	AAGCUCAGGAGGGAUAGCGC	ACGCUCUCUCUCCUGAGCUU	Cleavage	PHS1 poor homologous synapsis 1	3
AAGCUCAGGAGGGAUAGCGCC	Lus10026690	2.5	12.794	278	297	AAGCUCAGGAGGGAUAGCGC	ACGCUCUCUCUCCUGAGCUU	Cleavage	PHS1 poor homologous synapsis 1	3
AAGCUCAGGAGGGAUAGCGCC	Lus10026751	3.0	14.196	310	330	AAGCUCAGGAGGGAUAGCGCC	GGAACUAUCCCUGCUGAGCUU	Translation	Leucine-rich repeat (LRR) family protein	1
L. usitatissimum unigene library
miR319
UUGGACUGAAGGGAGCUCCCU	genolin_c20575	3.0	14.348	36	56	UUGGACUGAAGGGAGCUCCCU	GGAGAGCUCCUUUGGGUCCAA	Cleavage	ABC transporter	1
miR390
AAGCUCAGGAGGGAUAGCGCC	genolin_c19878	3.0	8.782	156	175	AAGCUCAGGAGGGAUAGCGC	UGUCUAUCCCUCCUGAGCUU	Cleavage	TAS3	1
